# Supplementary material for: A Single-Cell Atlas of Coral Bleaching
Source: Research Square preprint supplement (doi:10.21203/rs.3.rs-5397639/v1), 2024-12-03
Supplement: Supplementary file 1 [file 19b12ea5756e6e50229641c3.xlsx]

## Sheet: Notable Matches
Original Numerical Cluster ID	Final Ofav ID	Notes	Notable Matching Markers
0	Unidentified	Possible catch-all for weird cells	N/A
1	Epidermis	Very strong epidermis marker	Very Strong QW917_024321 (peroxidasin)
2	Breviolum-hosting Cells	Mapping: 50% Host, 50% Symbiont	N/A
3	Extracellular Breviolum	Mapping: ~90% Breviolum Expression	N/A
4	Calicoblastic Cells	All Calicoblast Orthologs Matched, plus this cluster is commoly similar to the epidermis	QW917_030981 (hemicentin_1), QW917_014249 (monooxygenase_DBH_like_1), QW917_000806 (uncharacterized protein)
5	Gastrodermis 1	Gastrodermal Markers match very well with Stylophora Atlas	QW917-023314 (Trichohyalin-like isoform X1), QW917-027832 (Novel_lipoprotein_amino_terminal_region_containing_protein), QW917-027832 (Neuropilin_2), QW917-023314 (Novel_lipoprotein_amino_terminal_region_containing_protein), QW917-022246 (Phospholipase A1 member A)
6	Gastrodermis 2	Gastrodermal Markers match very well with Stylophora Atlas	QW917-023314 (Trichohyalin-like isoform X1), QW917-027832 (Novel_lipoprotein_amino_terminal_region_containing_protein), QW917-027832 (Neuropilin_2), QW917-023314 (Novel_lipoprotein_amino_terminal_region_containing_protein), QW917-022246 (Phospholipase A1 member A)
7	Gland 1	Heatmap matching Spis atlas	N/A
8	Neurons 1	Majority Neuron Markers	QW917-024398 (Carbohydrate kinase PfkB), QW917_014543 (polycystin_1_like_2_gene_pseudogene), QW917_014759 (ion-NaKCa.HG18.0:CACNA1G/CACNA1H/CACNA1I), QW917_019811 (ion-NaKCa.HG2.2:PKD2/PKD2L1/PKD2L2), QW917_015857, QW917_032667 (carboxypeptidase_A2)
9	Immune	Perforin 2 expression	Immune: QW917-002392 & QW917-001287 (Membrane attack complex component/perforin (MACPF) domain;)
10	Neurons 2		QW917-024396 (RNA pseudouridylate synthase domain containing protein 2) & QW917-008288 (Guanylate kinase/L-type calcium channel beta subunit)
11	Gland 2	Mostly Gland Markers	QW917-033692 (Fraser_extracellular_matrix_complex_subunit_1) & QW917-033413 (PA14 domain)
12	Neurons 3	Matching markers with cluster 8	QW917_019811 (ion-NaKCa.HG2.2:PKD2/PKD2L1/PKD2L2)
13	Gastrodermis (Muscle-like)	Gastrodermal Markers match very well with Stylophora Atlas	QW917-027832 (Neuropilin_2), QW917-023314 (trichohyalin-like isoform X1), QW917-022246 (Phospholipase A1 member A)- Gastrodermal Markers, Muscle: QW917-031802 (Uncharacertized Protein), QW917-005475 (BTB/POZ domain), QW917-013062 (SEFIR domain),
14	Durusdinium-hosting Cells	Mapping: 75% symbiont, 25% coral	N/A
15	Digestive Filaments	Common orthologs with Digestive Markers	QW917-025039, QW917-017802 (Sporulation-specific protein 15-like),
16	Precursors		QW917-011148 (Acyl-CoA thioester hydrolase/BAAT)
17	Gland 3	Markers Genes from Levy et al Figure	QW917-011145 (Sulfotransferase) & QW917-021831 (Carbohydrate sulfotransferase 14)
18	Cnidocytes	All Cnidocyte Orthologs Matched	QW917_014975 (Collagen.HG10.0:NA), QW917_001734 (uncharacterized protein LOC111329142), QW917_001714 (LOW QUALITY PROTEIN: uncharacterized protein LOC111329145), QW917_001720 (uncharacterized protein LOC111329156 isoform X1), QW917_035574 (phosphopantothenoylcysteine decarboxylase subunit VHS3-like isoform X2), QW917_001007 (protein starmaker-like), QW917_017141 (formin-like protein 5), QW917_017…
