# Supplementary material for: A Single-Cell Atlas of Coral Bleaching
Source: Research Square preprint supplement (doi:10.21203/rs.3.rs-5397639/v1), 2024-12-03
Supplement: Supplementary file 1 [file bb381b877ac8123b68217201.pdf]

Calicoblastic Cells

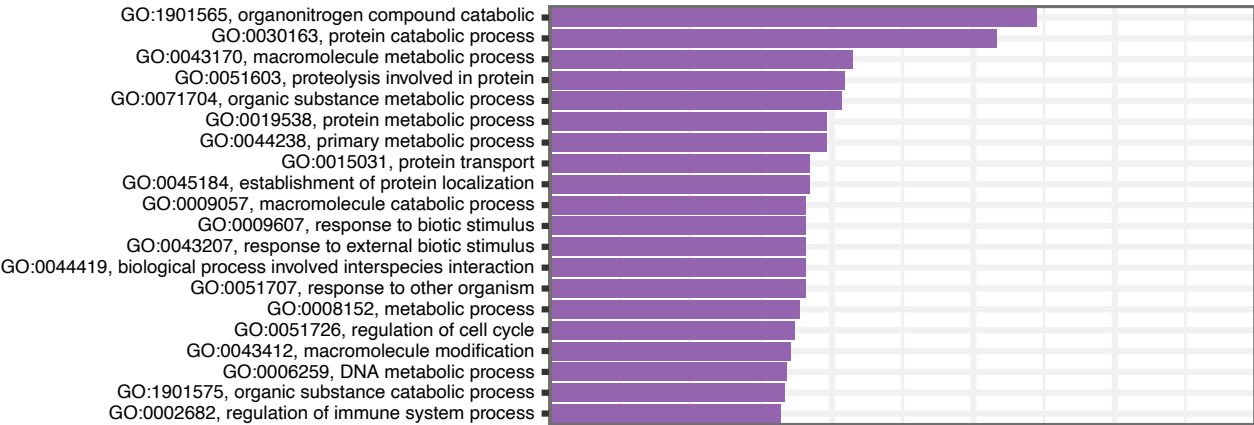

Cnidocytes

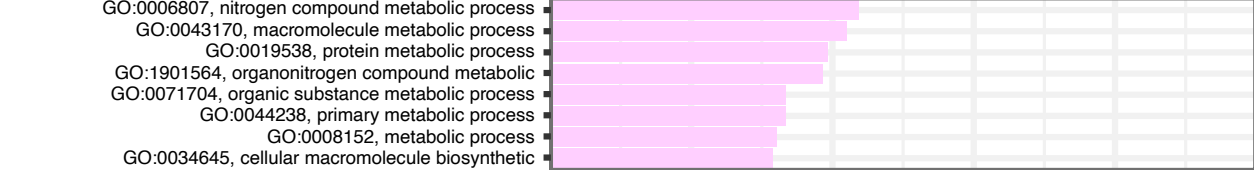

Digestive Filaments

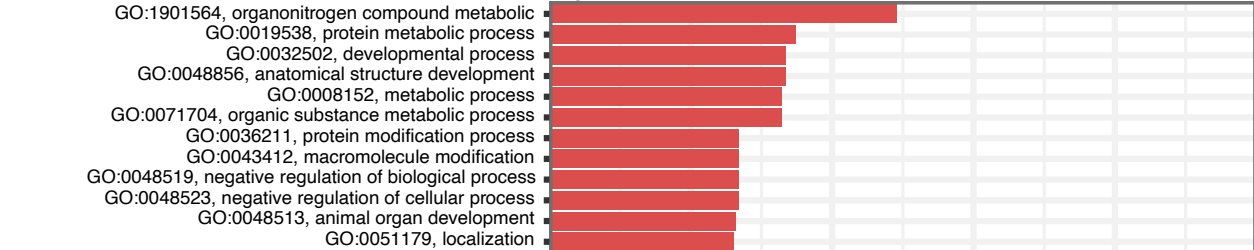

Epidermis

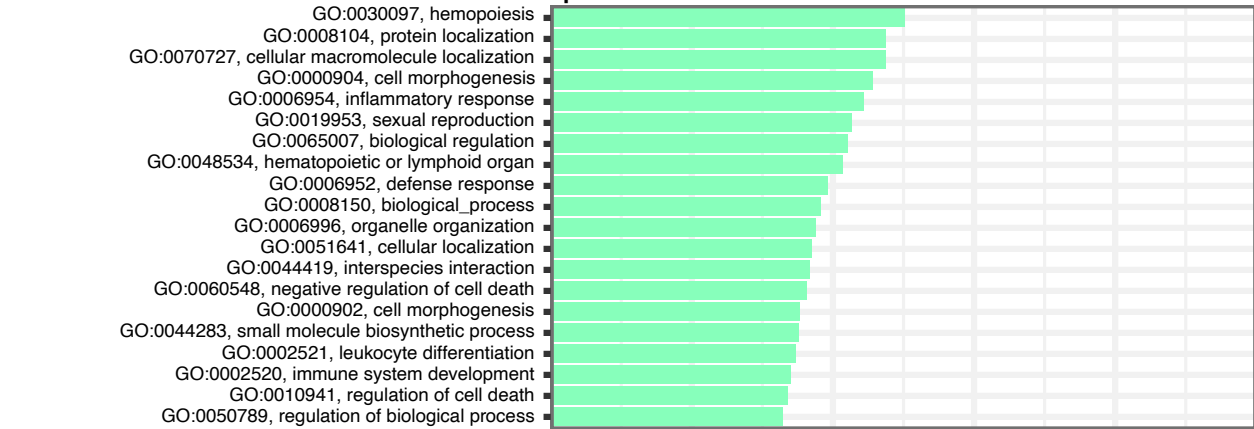

Gastrodermis

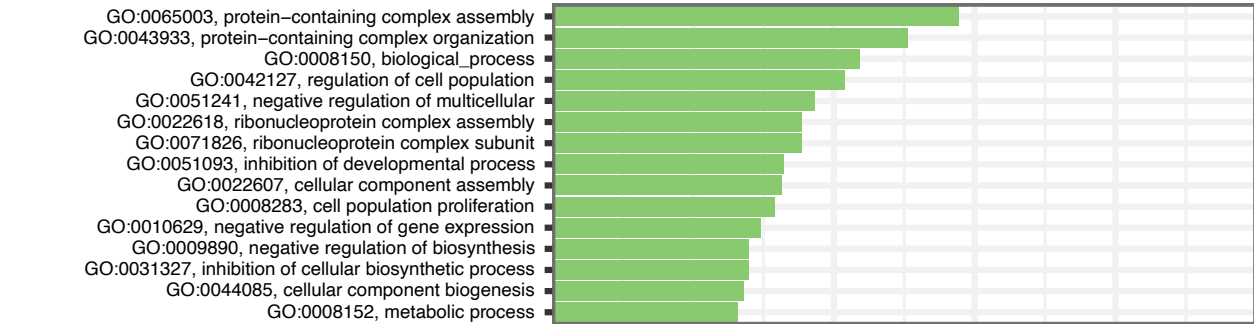

Gland Cells

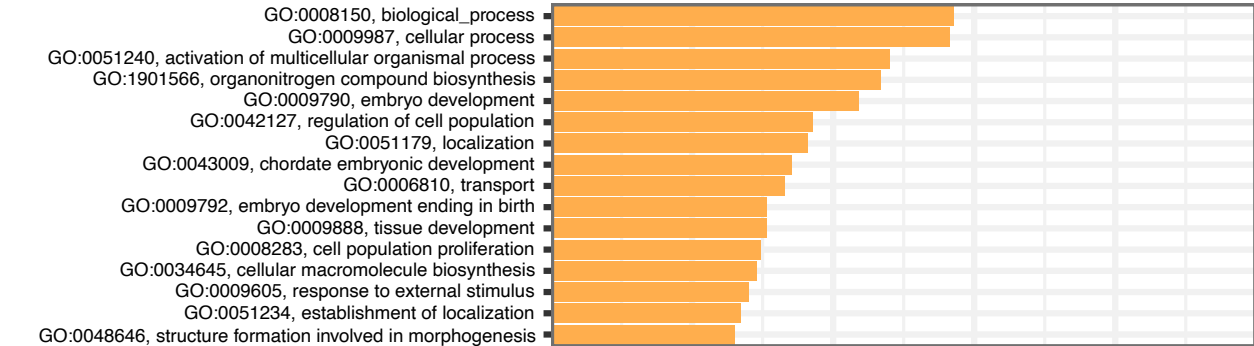

Immune Cells

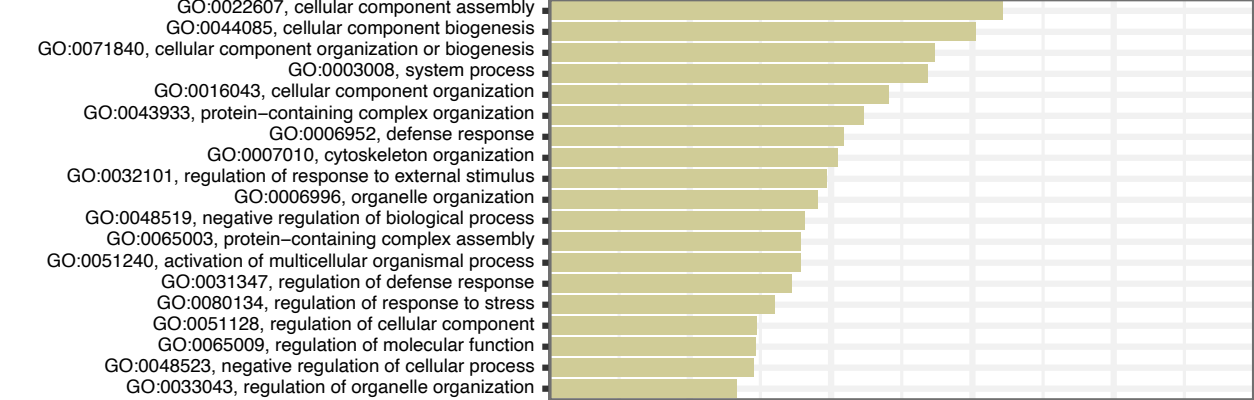

Neurons

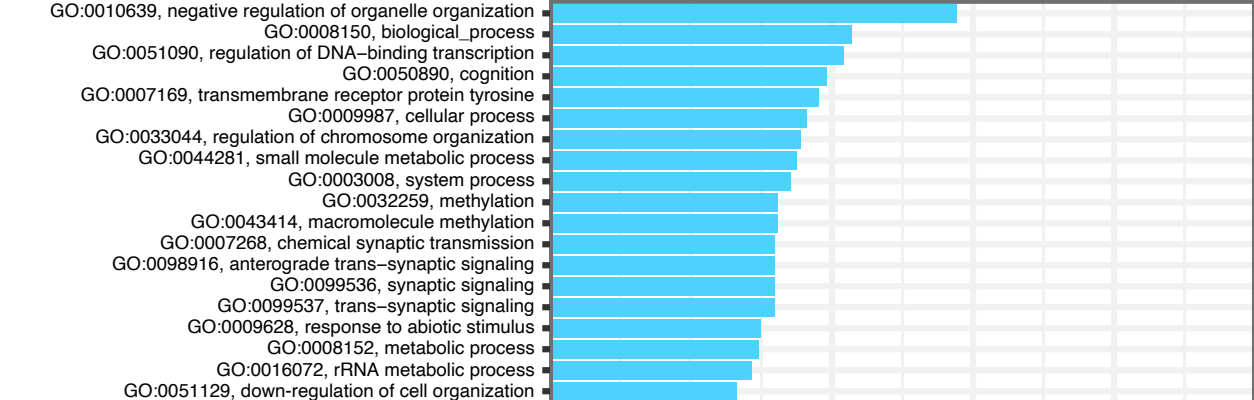

Precursors

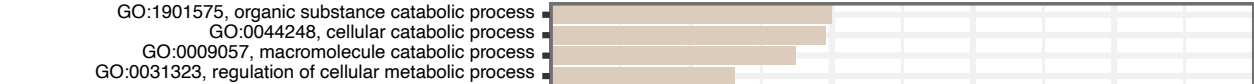

Enrichment (-log10 of P-value)
