# Supplementary material for: A Single-Cell Atlas of Coral Bleaching
Source: Research Square preprint supplement (doi:10.21203/rs.3.rs-5397639/v1), 2024-12-03
Supplement: Supplementary file 2 [file 743c0ec4810ed9c8b0c4bdfe.xlsx]

## Sheet: CoralClusterDEGS
Gene	1st Significant Timepoint	Cell Cluster ID	Response	Avg. Log2FC	Adjusted P-value	Gene Name	Gene Alias	PFAM	COG
QW917-036332	Mid-Bleach 1	Calicoblastic Cells	Down-regulated	1.59338	1.16566e-09	Uncharacterized Gene			0
QW917-036331	Mid-Bleach 1	Calicoblastic Cells	Down-regulated	1.46098	1.04629e-08	0	hypothetical protein	IPR001054 Adenylyl cyclase class-3/4/guanylyl cyclase;IPR011645 Haem NO binding associated;IPR013587 Nitrate/nitrite sensing protein;IPR029787 Nucleotide cyclase	T:(T) Signal transduction mechanisms
QW917-034316	Mid-Bleach 1	Calicoblastic Cells	Down-regulated	0.69371	0.0126668	0	hypothetical protein	0	0
QW917-009678	Mid-Bleach 1	Calicoblastic Cells	Down-regulated	0.65646	0.0476671	STAM2_2	Signal transducing adapter molecule 2	IPR001452 SH3 domain;IPR036028 SH3-like domain superfamily	T:(T) Signal transduction mechanisms
QW917-002686	Mid-Bleach 1	Calicoblastic Cells	Up-regulated	1.23241	0.000356756	0	hypothetical protein	IPR001254 Serine proteases, trypsin domain;IPR001314 Peptidase S1A, chymotrypsin family;IPR009003 Peptidase S1, PA clan;IPR043504 Peptidase S1, PA clan, chymotrypsin-like fold	O:(O) Posttranslational modification, protein turnover, chaperones
QW917-016878	Mid-Bleach 1	Digestive Filaments	Up-regulated	6.19132	5.14064e-08	MYO1D	Unconventional myosin-Id	IPR001609 Myosin head, motor domain;IPR010926 Class I myosin tail homology domain;IPR027417 P-loop containing nucleoside triphosphate hydrolase;IPR036072 Class I myosin, motor domain;IPR036961 Kinesin motor domain superfamily	Z:(Z) Cytoskeleton
QW917-030986	Mid-Bleach 1	Epidermis	Down-regulated	1.92495	7.11975e-21	0	hypothetical protein	0	0
QW917-023065	Mid-Bleach 1	Epidermis	Down-regulated	1.09872	7.57847e-10	0	tRNA-Ser	0	0
QW917-024580	Mid-Bleach 1	Epidermis	Up-regulated	1.93541	3.54091e-39	0	hypothetical protein	IPR027417 P-loop containing nucleoside triphosphate hydrolase;IPR032171 C-terminal of Roc (COR) domain	K:(K) Transcription;L:(L) Replication, recombination and repair;T:(T) Signal transduction mechanisms
QW917-002944	Mid-Bleach 1	Epidermis	Up-regulated	1.01942	4.75154e-18	0	tRNA-Thr	0	0
QW917-016491	Mid-Bleach 1	Epidermis	Up-regulated	0.93749	5.42579e-16	TUBA3D_2	Tubulin alpha-3C/D chain, variant 2	IPR000217 Tubulin;IPR002452 Alpha tubulin;IPR003008 Tubulin/FtsZ, GTPase domain;IPR008280 Tubulin/FtsZ, C-terminal;IPR018316 Tubulin/FtsZ, 2-layer sandwich domain;IPR023123 Tubulin, C-terminal;IPR036525 Tubulin/FtsZ, GTPase domain superfamily;IPR037103 Tubulin/FtsZ-like, C-terminal domain	Z:(Z) Cytoskeleton
QW917-001525	Mid-Bleach 1	Epidermis	Up-regulated	0.779522	2.2836e-12	0	hypothetical protein	IPR000756 Diacylglycerol kinase, accessory domain;IPR001206 Diacylglycerol kinase, catalytic domain;IPR002110 Ankyrin repeat;IPR002219 Protein kinase C-like, phorbol ester/diacylglycerol-binding domain;IPR016064 NAD kinase/diacylglycerol kinase-like domain superfamily;IPR017438 Inorganic polyphosphate/ATP-NAD kinase, N-terminal;IPR036770 Ankyrin repeat-containing domain superfamily;IPR037607 Diac…	T:(T) Signal transduction mechanisms
QW917-030101	Mid-Bleach 1	Epidermis	Up-regulated	0.659218	6.48974e-09	FBXW7	F-box/WD repeat-containing protein 7	IPR001680 WD40 repeat;IPR001810 F-box domain;IPR010994 RuvA domain 2-like;IPR015943 WD40/YVTN repeat-like-containing domain superfamily;IPR020472 G-protein beta WD-40 repeat;IPR036047 F-box-like domain superfamily;IPR036322 WD40-repeat-containing domain superfamily	S:(S) Function unknown
QW917-018353	Mid-Bleach 1	Epidermis	Up-regulated	0.65241	1.56407e-07	0	hypothetical protein	IPR003598 Immunoglobulin subtype 2;IPR003599 Immunoglobulin subtype;IPR013098 Immunoglobulin I-set;IPR013783 Immunoglobulin-like fold;IPR036179 Immunoglobulin-like domain superfamily	T:(T) Signal transduction mechanisms
QW917-013752	Mid-Bleach 1	Epidermis	Up-regulated	0.5699	0.000303218	0	tRNA-Thr	0	0
QW917-003971	Mid-Bleach 2	Calicoblastic Cells	Down-regulated	1.14764	0.00327448	0	hypothetical protein	0	0
QW917-023502	Mid-Bleach 2	Epidermis	Down-regulated	0.809548	0.00273416	0	tRNA-Thr	0	0
QW917-011241	Mid-Bleach 2	Epidermis	Up-regulated	0.615325	0.000137223	EDIL3_4	EGF-like repeat and discoidin I-like domain-containing protein 3	IPR000421 Coagulation factor 5/8 C-terminal domain;IPR008979 Galactose-binding-like domain superfamily	T:(T) Signal transduction mechanisms
QW917-014250	Mid-Bleach 2	Epidermis	Up-regulated	0.646991	0.0012251	0	tRNA-Gly	0	0
QW917-034318	Mid-Bleach 2	Epidermis	Up-regulated	0.679721	0.00815978	0	tRNA-Thr	0	0
QW917-017006	Mid-Bleach 2	Gastrodermis (Muscle-like)	Down-regulated	2.52698	0.000865735	0	hypothetical protein	IPR002036 Endoribonuclease YbeY;IPR023091 Metalloprotease catalytic domain superfamily, predicted	S:(S) Function unknown
QW917-017942	Mid-Bleach 2	Gland	Down-regulated	4.56277	1.2879e-20	0	hypothetical protein	0	0
QW917-031968	Mid-Bleach 2	Gland	Up-regulated	2.25287	2.83662e-12	0	tRNA-Gly	0	0
QW917-034154	Mid-Bleach 2	Gland	Up-regulated	1.38667	1.68825e-10	0	hypothetical protein	0	0
QW917-024171	Mid-Bleach 2	Gland	Up-regulated	1.20461	2.14522e-09	0	hypothetical protein	IPR001828 Receptor, ligand binding region;IPR002455 GPCR family 3, GABA-B receptor;IPR017978 GPCR family 3, C-terminal;IPR028082 Periplasmic binding protein-like I	T:(T) Signal transduction mechanisms
QW917-026657	Mid-Bleach 2	Gland	Up-regulated	1.05093	3.44348e-09	0	hypothetical protein	0	S:(S) Function unknown
QW917-010184	Mid-Bleach 2	Gland	Up-regulated	1.68426	3.59702e-06	0	tRNA-Leu	0	0
QW917-031802	Mid-Bleach 2	Gland	Up-regulated	0.669921	0.0268483	0	hypothetical protein	0	0
QW917-005894	Mid-Bleach 2	Immune	Up-regulated	1.20273	0.0356135	KCTD7_2	BTB (POZ) domain-containing protein	IPR000210 BTB/POZ domain;IPR003131 Potassium channel tetramerisation-type BTB domain;IPR006571 TLDc domain;IPR011333 SKP1/BTB/POZ domain superfamily	S:(S) Function unknown
QW917-010145	Bleached	Calicoblastic Cells	Down-regulated	5.09568	4.07535e-65	0	hypothetical protein	IPR000998 MAM domain;IPR002172 Low-density lipoprotein (LDL) receptor class A repeat;IPR013320 Concanavalin A-like lectin/glucanase domain superfamily;IPR036055 LDL receptor-like superfamily	T:(T) Signal transduction mechanisms
QW917-010146	Bleached	Calicoblastic Cells	Down-regulated	4.42611	3.42443e-54	0	hypothetical protein	IPR000519 P-type trefoil domain;IPR000998 MAM domain;IPR002172 Low-density lipoprotein (LDL) receptor class A repeat;IPR013320 Concanavalin A-like lectin/glucanase domain superfamily;IPR017994 P-type trefoil, chordata;IPR036055 LDL receptor-like superfamily;IPR044913 P-type trefoil domain superfamily	T:(T) Signal transduction mechanisms
QW917-009324	Bleached	Calicoblastic Cells	Down-regulated	1.05013	3.94956e-09	0	hypothetical protein	0	0
QW917-008341	Bleached	Calicoblastic Cells	Down-regulated	1.15384	5.26168e-08	DIO3_1	Thyroxine 5-deiodinase	IPR001965 Zinc finger, PHD-type;IPR011011 Zinc finger, FYVE/PHD-type;IPR013083 Zinc finger, RING/FYVE/PHD-type;IPR042013 PHF7/G2E3, ePHD domain	C:(C) Energy production and conversion
QW917-029254	Bleached	Calicoblastic Cells	Down-regulated	0.701736	1.67349e-06	PRSS21_2	Testisin, variant 2	IPR000436 Sushi/SCR/CCP domain;IPR001254 Serine proteases, trypsin domain;IPR001314 Peptidase S1A, chymotrypsin family;IPR009003 Peptidase S1, PA clan;IPR035976 Sushi/SCR/CCP superfamily;IPR043504 Peptidase S1, PA clan, chymotrypsin-like fold	O:(O) Posttranslational modification, protein turnover, chaperones
QW917-032489	Bleached	Calicoblastic Cells	Down-regulated	0.705712	2.55671e-06	0	hypothetical protein	0	0
QW917-015206	Bleached	Calicoblastic Cells	Down-regulated	0.741439	9.46023e-06	0	hypothetical protein	IPR000884 Thrombospondin type-1 (TSP1) repeat;IPR036383 Thrombospondin type-1 (TSP1) repeat superfamily;IPR039942 Somatomedin-B and thrombospondin type-1 domain-containing protein	T:(T) Signal transduction mechanisms
QW917-033575	Bleached	Calicoblastic Cells	Down-regulated	0.667857	2.36294e-05	0	hypothetical protein	IPR001604 DNA/RNA non-specific endonuclease;IPR020821 Extracellular Endonuclease, subunit A;IPR039015 Endonuclease domain-containing 1 protein;IPR044925 His-Me finger superfamily;IPR044929 DNA/RNA non-specific endonuclease superfamily	S:(S) Function unknown
QW917-009336	Bleached	Calicoblastic Cells	Down-regulated	0.637918	7.66786e-05	0	tRNA-Trp	0	0
QW917-013974	Bleached	Calicoblastic Cells	Down-regulated	0.639259	0.000209407	TOM1L2	TOM1-like protein 2	IPR002014 VHS domain;IPR004152 GAT domain;IPR008942 ENTH/VHS;IPR014645 Target of Myb protein 1;IPR038425 GAT domain superfamily	U:(U) Intracellular trafficking, secretion, and vesicular transport
QW917-000347	Bleached	Calicoblastic Cells	Down-regulated	0.748969	0.000220117	0	hypothetical protein	IPR001680 WD40 repeat;IPR015943 WD40/YVTN repeat-like-containing domain superfamily;IPR036322 WD40-repeat-containing domain superfamily	S:(S) Function unknown
QW917-018305	Bleached	Calicoblastic Cells	Down-regulated	0.764514	0.000288441	0	hypothetical protein	0	0
QW917-020799	Bleached	Calicoblastic Cells	Down-regulated	0.641712	0.000624648	RARS1	Arginine--tRNA ligase, cytoplasmic, variant 2	IPR001278 Arginine-tRNA ligase;IPR005148 Arginyl tRNA synthetase N-terminal domain;IPR008909 DALR anticodon binding;IPR009080 Aminoacyl-tRNA synthetase, class Ia, anticodon-binding;IPR014729 Rossmann-like alpha/beta/alpha sandwich fold;IPR035684 Arginyl-tRNA synthetase, catalytic core domain;IPR036695 Arginyl tRNA synthetase N-terminal domain superfamily	J:(J) Translation, ribosomal structure and biogenesis
QW917-005586	Bleached	Calicoblastic Cells	Down-regulated	0.68064	0.00104007	0	tRNA-Thr	0	0
QW917-006360	Bleached	Calicoblastic Cells	Down-regulated	0.668752	0.00202631	0	hypothetical protein	0	S:(S) Function unknown
QW917-024271	Bleached	Calicoblastic Cells	Down-regulated	0.587451	0.00243003	0	hypothetical protein	IPR029034 Cystine-knot cytokine	M:(M) Cell wall/membrane/envelope biogenesis
QW917-013452	Bleached	Calicoblastic Cells	Down-regulated	0.52789	0.00296459	0	hypothetical protein	0	0
QW917-028699	Bleached	Calicoblastic Cells	Down-regulated	0.612323	0.00316608	0	hypothetical protein	IPR002870 Peptidase M12B, propeptide;IPR024079 Metallopeptidase, catalytic domain superfamily	O:(O) Posttranslational modification, protein turnover, chaperones
QW917-024765	Bleached	Calicoblastic Cells	Down-regulated	0.622577	0.00430024	0	hypothetical protein	IPR000922 D-galactoside/L-rhamnose binding SUEL lectin domain;IPR008160 Collagen triple helix repeat;IPR043159 D-galactoside/L-rhamnose binding SUEL lectin domain superfamily	W:(W) Extracellular structures
QW917-024190	Bleached	Calicoblastic Cells	Down-regulated	0.627323	0.00944375	0	hypothetical protein	IPR007053 LRAT domain	S:(S) Function unknown
QW917-009778	Bleached	Calicoblastic Cells	Down-regulated	0.737146	0.0114513	0	hypothetical protein	IPR000884 Thrombospondin type-1 (TSP1) repeat;IPR003598 Immunoglobulin subtype 2;IPR003599 Immunoglobulin subtype;IPR008969 Carboxypeptidase-like, regulatory domain superfamily;IPR013783 Immunoglobulin-like fold;IPR036179 Immunoglobulin-like domain superfamily;IPR036383 Thrombospondin type-1 (TSP1) repeat superfamily;IPR039675 Cartilage intermediate layer protein 1/2	T:(T) Signal transduction mechanisms
QW917-001863	Bleached	Calicoblastic Cells	Down-regulated	0.79594	0.0121555	0	hypothetical protein	IPR000203 GPS motif;IPR000832 GPCR, family 2, secretin-like;IPR002035 von Willebrand factor, type A;IPR036465 von Willebrand factor A-like domain superfamily;IPR046338 GAIN domain superfamily	S:(S) Function unknown
QW917-032268	Bleached	Calicoblastic Cells	Down-regulated	0.756944	0.0170214	RPAP3	RNA polymerase II-associated protein 3	IPR001440 Tetratricopeptide repeat 1;IPR011990 Tetratricopeptide-like helical domain superfamily;IPR019734 Tetratricopeptide repeat;IPR025986 RNA-polymerase II-associated protein 3-like, C-terminal domain	S:(S) Function unknown
QW917-030285	Bleached	Calicoblastic Cells	Down-regulated	0.67371	0.0496558	0	hypothetical protein	IPR000276 G protein-coupled receptor, rhodopsin-like	O:(O) Posttranslational modification, protein turnover, chaperones
QW917-009174	Bleached	Calicoblastic Cells	Up-regulated	3.59998	9.74057e-55	0	hypothetical protein	0	O:(O) Posttranslational modification, protein turnover, chaperones
QW917-019333	Bleached	Calicoblastic Cells	Up-regulated	3.11302	3.21809e-34	0	tRNA-Ile	0	0
QW917-000806	Bleached	Calicoblastic Cells	Up-regulated	0.619973	4.6217e-22	0	hypothetical protein	0	0
QW917-030981	Bleached	Calicoblastic Cells	Up-regulated	1.21365	4.08661e-08	CASP8_2	Casp8p	IPR001875 Death effector domain;IPR011029 Death-like domain superfamily;IPR026298 Bcl-2 family;IPR036834 Bcl-2-like superfamily;IPR046371 Bcl-2, Bcl-2 homology region 1-3	D:(D) Cell cycle control, cell division, chromosome partitioning
QW917-036230	Bleached	Digestive Filaments	Down-regulated	11.473	0.000166414	0	tRNA-Thr	0	0
QW917-036231	Bleached	Digestive Filaments	Down-regulated	11.7509	0.000274187	0	hypothetical protein	IPR001680 WD40 repeat;IPR011047 Quinoprotein alcohol dehydrogenase-like superfamily;IPR015943 WD40/YVTN repeat-like-containing domain superfamily	0
QW917-017802	Bleached	Epidermis	Down-regulated	3.77405	9.65522e-57	0	hypothetical protein	0	0
QW917-031915	Bleached	Epidermis	Down-regulated	2.24129	1.32527e-51	0	hypothetical protein	IPR043502 DNA/RNA polymerase superfamily	L:(L) Replication, recombination and repair
QW917-005571	Bleached	Epidermis	Down-regulated	1.04637	1.08919e-10	MSH2	MutS-like protein	IPR000432 DNA mismatch repair protein MutS, C-terminal;IPR007695 DNA mismatch repair protein MutS-like, N-terminal;IPR007696 DNA mismatch repair protein MutS, core;IPR007860 DNA mismatch repair protein MutS, connector domain;IPR007861 DNA mismatch repair protein MutS, clamp;IPR011184 DNA mismatch repair Msh2-type;IPR016151 DNA mismatch repair protein MutS, N-terminal;IPR027417 P-loop containing n…	L:(L) Replication, recombination and repair
QW917-008044	Bleached	Epidermis	Up-regulated	4.35986	5.72497e-113	MED6	Mediator of RNA polymerase II transcription subunit 6	IPR007018 Mediator complex, subunit Med6;IPR016820 Mediator complex, subunit Med6, metazoa/plant;IPR038566 Mediator complex, subunit Med6 superfamily	K:(K) Transcription
QW917-033337	Bleached	Epidermis	Up-regulated	2.43169	3.41345e-51	0	tRNA-Thr	0	0
QW917-008780	Bleached	Epidermis	Up-regulated	0.809468	2.8277e-14	0	hypothetical protein	IPR000834 Peptidase M14, carboxypeptidase A;IPR040626 Cytosolic carboxypeptidase, N-terminal	E:(E) Amino acid transport and metabolism
QW917-018090	Bleached	Epidermis	Up-regulated	1.057	2.82121e-12	RSPH1_2	Radial spoke head 1	IPR003409 MORN repeat	S:(S) Function unknown
QW917-024491	Bleached	Gastrodermis (Muscle-like)	Down-regulated	5.23526	5.10352e-07	0	tRNA-Thr	0	0
QW917-002685	Bleached	Gastrodermis (Muscle-like)	Down-regulated	2.06071	4.9744e-06	0	hypothetical protein	0	0
QW917-015093	Bleached	Gastrodermis (Muscle-like)	Down-regulated	4.011	0.000118363	0	hypothetical protein	IPR002591 Type I phosphodiesterase/nucleotide pyrophosphatase/phosphate transferase;IPR017850 Alkaline-phosphatase-like, core domain superfamily	S:(S) Function unknown
QW917-021056	Bleached	Gastrodermis (Muscle-like)	Down-regulated	2.19973	0.0200773	0	hypothetical protein	IPR000626 Ubiquitin-like domain;IPR003118 Pointed domain;IPR013761 Sterile alpha motif/pointed domain superfamily;IPR029071 Ubiquitin-like domain superfamily	K:(K) Transcription
QW917-002611	Bleached	Gastrodermis (Muscle-like)	Up-regulated	9.87865	4.9663e-05	CDO1	Cysteine dioxygenase	IPR010300 Cysteine dioxygenase type I;IPR011051 RmlC-like cupin domain superfamily;IPR014710 RmlC-like jelly roll fold	E:(E) Amino acid transport and metabolism
QW917-005964	Bleached	Gastrodermis (Muscle-like)	Up-regulated	4.65063	0.0109068	WDR27	WD repeat-containing protein 27	IPR001680 WD40 repeat;IPR015943 WD40/YVTN repeat-like-containing domain superfamily;IPR036322 WD40-repeat-containing domain superfamily;IPR042411 WD repeat-containing protein 27	K:(K) Transcription
QW917-007767	Bleached	Gland	Up-regulated	1.56687	1.22034e-10	0	hypothetical protein	0	0
QW917-023314	Bleached	Gland	Up-regulated	0.715365	0.00150717	0	tRNA-Thr	0	0
QW917-033002	Bleached	Gland	Up-regulated	1.06794	0.00229971	0	tRNA-Thr	0	0
QW917-030646	Bleached	Immune	Down-regulated	2.65146	0.000107626	0	hypothetical protein	0	0
