# Supplementary material for: A Single-Cell Atlas of Coral Bleaching
Source: Research Square preprint supplement (doi:10.21203/rs.3.rs-5397639/v1), 2024-12-03
Supplement: Supplementary file 3 [file f3e29c0b4c4f98ba006fa229.xlsx]

## Sheet: Ofav Matches
Marker Gene	Cell Tpe	Atlas Species	Ofav Cluster Match	Ofav Gene Match	Ofav Gene Name	Ofav Gene Product	Ofav Interpro Annotation
Spis_XP_022806845_1	Digestive Filaments	Spis	0 (Unidentified)	QW917_006887	#N/A	#N/A	#N/A
Xesp_015086	Digestive Filaments	Xesp	0 (Unidentified)	QW917-009129	0	hypothetical protein	0
Spis_XP_022793420_1	Gastrodermis	Spis	0 (Unidentified)	QW917_023314	#N/A	#N/A	#N/A
Spis_XP_022805721_1	Gastrodermis	Spis	0 (Unidentified)	QW917_026632	#N/A	#N/A	#N/A
Nvec_v1g210012	Muscle	Nvec	0 (Unidentified)	QW917-022915	HGH1	Protein hgh1	IPR007205 Protein HGH1 N-terminal;IPR007206 Protein HGH1 C-terminal;IPR011989 Armadillo-like helical;IPR016024 Armadillo-type fold;IPR039717 Protein Hgh1
Nvec_v1g214299_1	Muscle	Nvec	0 (Unidentified)	QW917-012815	DNAI2	Dynein intermediate chain 2, axonemal	IPR001680 WD40 repeat;IPR015943 WD40/YVTN repeat-like-containing domain superfamily;IPR036322 WD40-repeat-containing domain superfamily
Spis_XP_022795301_1	Digestive Filaments	Spis	1 (Epidermis)	QW917_029780	#N/A	#N/A	#N/A
Spis_XP_022799527_1	Digestive Filaments	Spis	1 (Epidermis)	QW917_035246-T2 & QW917_029348-T1	#N/A	#N/A	#N/A
Nvec_v1g126293	Digestive Filaments	Nvec	1 (Epidermis)	QW917-025431	0	hypothetical protein	IPR003598 Immunoglobulin subtype 2;IPR003599 Immunoglobulin subtype;IPR008160 Collagen triple helix repeat;IPR013098 Immunoglobulin I-set;IPR013783 Immunoglobulin-like fold;IPR036056 Fibrinogen-like, C-terminal;IPR036179 Immunoglobulin-like domain superfamily
Hvul_g11543_2	Epidermis	Hvul	1 (Epidermis)	QW917-009830	#N/A	#N/A	#N/A
Hvul_g11543_4	Epidermis	Hvul	1 (Epidermis)	QW917-009835	0	hypothetical protein	IPR001245 Serine-threonine/tyrosine-protein kinase, catalytic domain;IPR011009 Protein kinase-like domain superfamily
Hvul_g11543_5	Epidermis	Hvul	1 (Epidermis)	QW917-035941	0	hypothetical protein	IPR005828 Major facilitator, sugar transporter-like;IPR036259 MFS transporter superfamily
Nvec_v1g234494_3	Epidermis	Nvec	1 (Epidermis)	QW917-014316	0	tRNA-Arg	0
Xesp_000344_2	Epidermis	Xesp	1 (Epidermis)	QW917-024321	0	hypothetical protein	IPR000595 Cyclic nucleotide-binding domain;IPR014710 RmlC-like jelly roll fold;IPR018490 Cyclic nucleotide-binding domain superfamily;IPR043533 None
Xesp_013615_1	Epidermis	Xesp	1 (Epidermis)	QW917-032302	0	hypothetical protein	IPR001849 Pleckstrin homology domain;IPR011993 PH-like domain superfamily
Spis_XP_022780954_1	Epidermis	Spis	1 (Epidermis)	QW917_023497	#N/A	melanotransferrin	#N/A
Spis_XP_022786186_1	Epidermis	Spis	1 (Epidermis)	QW917_001600	#N/A	BCCT/PLAC8/	#N/A
Spis_XP_022794543_1	Epidermis	Spis	1 (Epidermis)	QW917_014852	#N/A	PKHD1_like_1	#N/A
Spis_XP_022798424_1	Epidermis	Spis	1 (Epidermis)	QW917_024321	#N/A	peroxidasin	#N/A
Spis_XP_022801475_1	Epidermis	Spis	1 (Epidermis)	QW917_013054	#N/A	centrosome-associated protein CEP250-like	#N/A
Spis_XP_022804844_1	Epidermis	Spis	1 (Epidermis)	QW917_025244	#N/A	tRNA-Thr	#N/A
Hvul_g10382_3	Gastrodermis	Hvul	1 (Epidermis)	QW917-014316	0	tRNA-Arg	0
Spis_XP_022793819_1	Germline	Spis	1 (Epidermis)	QW917_013447	#N/A	#N/A	#N/A
Nvec_v1g169611_1	Muscle	Nvec	1 (Epidermis)	QW917-014316	0	tRNA-Arg	0
Xesp_014471_2	Precursors	Xesp	1 (Epidermis)	QW917-032302	0	hypothetical protein	IPR001849 Pleckstrin homology domain;IPR011993 PH-like domain superfamily
Spis_XP_022797242_1	Digestive Filaments	Spis	2 (Breviolum-hosting Cells)	QW917_017802	sporulation-specific protein 15-like	#N/A	#N/A
Spis_XP_022790329_2	Gland	Spis	2 (Breviolum-hosting Cells)	QW917_006276-T1, QW917_006277-T1, QW917_006277-T2	#N/A	#N/A	#N/A
Spis_XP_022794354_1	Gland	Spis	2 (Breviolum-hosting Cells)	QW917_006351	#N/A	#N/A	#N/A
Spis_XP_022783415_1	Calicoblastic Cells	Spis	4 (Calicoblastic Cells)	QW917_030981-T1	#N/A	#N/A	#N/A
Spis_XP_022788453_1	Calicoblastic Cells	Spis	4 (Calicoblastic Cells)	QW917_014249	#N/A	#N/A	#N/A
Spis_XP_022793606_1	Calicoblastic Cells	Spis	4 (Calicoblastic Cells)	QW917_000806-T1	#N/A	#N/A	#N/A
Spis_XP_022787678_1	Digestive Filaments	Spis	4 (Calicoblastic Cells)	QW917_022743-T1	#N/A	#N/A	#N/A
Spis_XP_022799527_2	Digestive Filaments	Spis	4 (Calicoblastic Cells)	QW917_035246-T2 & QW917_029348-T1	#N/A	#N/A	#N/A
Hvul_g31502_1	Epidermis	Hvul	4 (Calicoblastic Cells)	QW917-031964	0	hypothetical protein	IPR001245 Serine-threonine/tyrosine-protein kinase, catalytic domain;IPR011009 Protein kinase-like domain superfamily
Xesp_000344_1	Epidermis	Xesp	4 (Calicoblastic Cells)	QW917-024323	0	hypothetical protein	IPR000276 G protein-coupled receptor, rhodopsin-like
Xesp_000345_1	Epidermis	Xesp	4 (Calicoblastic Cells)	QW917-024322	0	hypothetical protein	0
Xesp_000345_2	Epidermis	Xesp	4 (Calicoblastic Cells)	QW917-024334	PLBD2_2	Putative phospholipase B-like 2	IPR007000 Phospholipase B-like
Xesp_000345_3	Epidermis	Xesp	4 (Calicoblastic Cells)	QW917-024323	0	hypothetical protein	IPR000276 G protein-coupled receptor, rhodopsin-like
Xesp_004625_2	Epidermis	Xesp	4 (Calicoblastic Cells)	QW917-027542	0	hypothetical protein	IPR013783 Immunoglobulin-like fold;IPR036179 Immunoglobulin-like domain superfamily
Xesp_004625_3	Epidermis	Xesp	4 (Calicoblastic Cells)	QW917-027544	#N/A	#N/A	#N/A
Xesp_004625_4	Epidermis	Xesp	4 (Calicoblastic Cells)	QW917-027545	0	hypothetical protein	0
Xesp_014383	Gastrodermis	Xesp	4 (Calicoblastic Cells)	QW917-019333	0	tRNA-Ile	0
Spis_XP_022793819_2	Germline	Spis	4 (Calicoblastic Cells)	QW917_013447	#N/A	#N/A	#N/A
Hvul_g25080	Gland	Hvul	4 (Calicoblastic Cells)	QW917-031964	0	hypothetical protein	IPR001245 Serine-threonine/tyrosine-protein kinase, catalytic domain;IPR011009 Protein kinase-like domain superfamily
Xesp_002650	Gland	Xesp	4 (Calicoblastic Cells)	QW917-021074	0	hypothetical protein	IPR000276 G protein-coupled receptor, rhodopsin-like
Nvec_v1g186216_1	Neurons	Nvec	4 (Calicoblastic Cells)	QW917-024395	RPUSD2_4	RNA pseudouridylate synthase domain containing protein 2, variant 2	IPR006145 Pseudouridine synthase, RsuA/RluA-like;IPR020103 Pseudouridine synthase, catalytic domain superfamily
Xesp_013753_1	Precursors	Xesp	4 (Calicoblastic Cells)	QW917-014453	0	tRNA-Arg	0
Nvec_v1g114134_1	Gastrodermis	Nvec	5 (Gastrodermis 1)	QW917-036204	0	hypothetical protein	IPR001810 F-box domain;IPR036047 F-box-like domain superfamily
Nvec_v1g114134_2	Gastrodermis	Nvec	5 (Gastrodermis 1)	QW917-036205	0	hypothetical protein	IPR029705 VPS35 endosomal protein sorting factor-like
Nvec_v1g114134_3	Gastrodermis	Nvec	5 (Gastrodermis 1)	QW917-036203	0	hypothetical protein	IPR003593 AAA+ ATPase domain;IPR004273 Dynein heavy chain region D6 P-loop domain;IPR013594 Dynein heavy chain, tail;IPR013602 Dynein heavy chain, linker;IPR024317 Dynein heavy chain, AAA module D4;IPR024743 Dynein heavy chain, coiled coil stalk;IPR026983 Dynein heavy chain;IPR027417 P-loop containing nucleoside triphosphate hydrolase;IPR035699 Dynein heavy chain, hydrolytic ATP-binding dynein mo…
Xesp_007182_1	Neurons	Xesp	5 (Gastrodermis 1)	QW917-025455	0	hypothetical protein	IPR001672 Phosphoglucose isomerase (PGI);IPR023096 Phosphoglucose isomerase, C-terminal;IPR035476 Phosphoglucose isomerase, SIS domain 1;IPR035482 Phosphoglucose isomerase, SIS domain 2;IPR046348 SIS domain superfamily
Xesp_000857_2	Algal Hosting Cells	Xesp	6 (Gastrodermis 2)	QW917_034380	#N/A	#N/A	#N/A
Xesp_000857_3	Algal Hosting Cells	Xesp	6 (Gastrodermis 2)	QW917_035325	#N/A	#N/A	#N/A
Xesp_000857_4	Algal Hosting Cells	Xesp	6 (Gastrodermis 2)	QW917_031733	#N/A	#N/A	#N/A
Xesp_014909_1	Algal Hosting Cells	Xesp	6 (Gastrodermis 2)	QW917-018318	0	hypothetical protein	0
Xesp_022796_1	Algal Hosting Cells	Xesp	6 (Gastrodermis 2)	QW917-018318	0	hypothetical protein	0
Spis_XP_022786709_1	Algal Hosting Cells	Spis	6 (Gastrodermis 2)	QW917_025270-T1	#N/A	#N/A	#N/A
Spis_XP_022786917_1	Algal Hosting Cells	Spis	6 (Gastrodermis 2)	QW917_030646-T1	#N/A	#N/A	#N/A
Spis_XP_022789093_1	Algal Hosting Cells	Spis	6 (Gastrodermis 2)	QW917_029111	#N/A	#N/A	#N/A
Spis_XP_022796495_1	Digestive Filaments	Spis	6 (Gastrodermis 2)	QW917_006427	#N/A	#N/A	#N/A
Xesp_004625_1	Epidermis	Xesp	6 (Gastrodermis 2)	QW917-023065	0	tRNA-Ser	0
Nvec_v1g84136_1	Gastrodermis	Nvec	6 (Gastrodermis 2)	QW917-027832	PLA1A	Phospholipase A1 member A	IPR000734 Triacylglycerol lipase family;IPR013818 Lipase;IPR029058 Alpha/Beta hydrolase fold;IPR033906 Lipase, N-terminal
Xesp_000519	Gastrodermis	Xesp	6 (Gastrodermis 2)	QW917-029370	LRP5_4	lipoprotein receptor-related protein	IPR000033 LDLR class B repeat;IPR000742 EGF-like domain;IPR011042 Six-bladed beta-propeller, TolB-like
Spis_XP_022785263_1	Gastrodermis	Spis	6 (Gastrodermis 2)	QW917_027832	#N/A	#N/A	#N/A
Spis_XP_022793420_2	Gastrodermis	Spis	6 (Gastrodermis 2)	QW917_023314	#N/A	#N/A	#N/A
Spis_XP_022787013_1	Mitotic Host Cells	Spis	6 (Gastrodermis 2)	QW917_028146	#N/A	#N/A	#N/A
Xesp_018334_2	Precursors	Xesp	6 (Gastrodermis 2)	QW917-023156	#N/A	#N/A	#N/A
Nvec_v1g242253_1	Epidermis	Nvec	7 (Gland 1)	QW917-034906	KDM2A_2	Lysine-specific demethylase 2A, variant 2	0
Nvec_v1g242253_2	Epidermis	Nvec	7 (Gland 1)	QW917-034905	KDM2A_2	Lysine-specific demethylase 2A	0
Spis_XP_022790329_1	Gland	Spis	7 (Gland 1)	QW917_006276-T1, QW917_006277-T1, QW917_006277-T2	#N/A	#N/A	#N/A
Hvul_g30764_2	Gland	Hvul	8 (Neurons 1)	QW917-019305	0	tRNA-Ala	0
Spis_XP_022783192_1	Gland	Spis	8 (Neurons 1)	QW917_027115	#N/A	#N/A	#N/A
Hvul_g24271_2	Neurons	Hvul	8 (Neurons 1)	QW917-024398	0	hypothetical protein	IPR011611 Carbohydrate kinase PfkB;IPR029056 Ribokinase-like;IPR034093 Ketohexokinase
Hvul_g24271_3	Neurons	Hvul	8 (Neurons 1)	QW917-024399	KPNA4_2	Importin subunit alpha-3	IPR000225 Armadillo;IPR002652 Importin-alpha, importin-beta-binding domain;IPR011989 Armadillo-like helical;IPR016024 Armadillo-type fold;IPR024931 Importin subunit alpha;IPR032413 Atypical Arm repeat;IPR036975 Importin-alpha, importin-beta-binding domain superfamily
Nvec_v1g160716_1	Neurons	Nvec	8 (Neurons 1)	QW917-029994	0	hypothetical protein	IPR011029 Death-like domain superfamily
Nvec_v1g186216_3	Neurons	Nvec	8 (Neurons 1)	QW917-024398	0	hypothetical protein	IPR011611 Carbohydrate kinase PfkB;IPR029056 Ribokinase-like;IPR034093 Ketohexokinase
Nvec_v1g186216_4	Neurons	Nvec	8 (Neurons 1)	QW917-024399	KPNA4_2	Importin subunit alpha-3	IPR000225 Armadillo;IPR002652 Importin-alpha, importin-beta-binding domain;IPR011989 Armadillo-like helical;IPR016024 Armadillo-type fold;IPR024931 Importin subunit alpha;IPR032413 Atypical Arm repeat;IPR036975 Importin-alpha, importin-beta-binding domain superfamily
Xesp_007182_3	Neurons	Xesp	8 (Neurons 1)	QW917-025456	0	hypothetical protein	IPR001672 Phosphoglucose isomerase (PGI);IPR023096 Phosphoglucose isomerase, C-terminal;IPR035476 Phosphoglucose isomerase, SIS domain 1;IPR035482 Phosphoglucose isomerase, SIS domain 2;IPR046348 SIS domain superfamily
Xesp_013614_1	Neurons	Xesp	8 (Neurons 1)	QW917-016542	0	tRNA-Thr	0
Xesp_013614_2	Neurons	Xesp	8 (Neurons 1)	QW917-011194	TBC1D8	TBC1 domain member 8B	IPR000195 Rab-GAP-TBC domain;IPR004182 GRAM domain;IPR011992 EF-hand domain pair;IPR011993 PH-like domain superfamily;IPR035969 Rab-GAP-TBC domain superfamily;IPR036014 TCB1D9/TCB1D9B, PH-GRAM domain 1;IPR036017 TCB1D9/TCB1D9B, PH-GRAM domain 2
Xesp_014743_2	Neurons	Xesp	8 (Neurons 1)	QW917-012978	0	hypothetical protein	IPR000917 Sulfatase, N-terminal;IPR017850 Alkaline-phosphatase-like, core domain superfamily
Spis_XP_022780302_1	Neurons	Spis	8 (Neurons 1)	QW917_014543	#N/A	#N/A	#N/A
Spis_XP_022784214_1	Neurons	Spis	8 (Neurons 1)	QW917_014759	#N/A	#N/A	#N/A
Spis_XP_022786096_1	Neurons	Spis	8 (Neurons 1)	QW917_019811	#N/A	#N/A	#N/A
Spis_XP_022788474_1	Neurons	Spis	8 (Neurons 1)	QW917_015857-T1 & QW917_015858	#N/A	#N/A	#N/A
Spis_XP_022797363_1	Neurons	Spis	8 (Neurons 1)	QW917_032667	#N/A	#N/A	#N/A
Hvul_g11299_1	Precursors	Hvul	8 (Neurons 1)	QW917-024236	FTSJ3	pre-rRNA processing protein ftsj3	IPR002877 Ribosomal RNA methyltransferase, FtsJ domain;IPR012920 Ribosomal RNA methyltransferase, SPB1-like, C-terminal;IPR024576 Ribosomal RNA methyltransferase Spb1, domain of unknown function DUF3381;IPR029063 S-adenosyl-L-methionine-dependent methyltransferase superfamily
Nvec_v1g131609_1	Precursors	Nvec	8 (Neurons 1)	QW917-024236	FTSJ3	pre-rRNA processing protein ftsj3	IPR002877 Ribosomal RNA methyltransferase, FtsJ domain;IPR012920 Ribosomal RNA methyltransferase, SPB1-like, C-terminal;IPR024576 Ribosomal RNA methyltransferase Spb1, domain of unknown function DUF3381;IPR029063 S-adenosyl-L-methionine-dependent methyltransferase superfamily
Xesp_023317	Precursors	Xesp	8 (Neurons 1)	QW917-001746	0	hypothetical protein	IPR002035 von Willebrand factor, type A;IPR032770 Domain of unknown function DUF4537;IPR036465 von Willebrand factor A-like domain superfamily
Spis_XP_022787225_1	Algal Hosting Cells	Spis	9 (Immune)	QW917_021361-T1	#N/A	#N/A	#N/A
Hvul_g2661_2	Cnidocytes	Hvul	9 (Immune)	QW917-033744	0	hypothetical protein	0
Hvul_g2661_1	Cnidocytes	Hvul	9 (Immune)	QW917-005122	0	hypothetical protein	IPR000415 Nitroreductase-like;IPR029479 Nitroreductase
Nvec_v1g129977_3	Neurons	Nvec	9 (Immune)	QW917-030932	0	tRNA-Ala	0
Nvec_v1g13439	Digestive Filaments	Nvec	10 (Neurons 2)	QW917-032267	0	hypothetical protein	IPR011029 Death-like domain superfamily
Hvul_g1835	Germline	Hvul	10 (Neurons 2)	QW917-035069	0	tRNA-Leu	0
Spis_XP_022779497_1	Mitotic Host Cells	Spis	10 (Neurons 2)	QW917_025832-T1, QW917_018822-T1, QW917_025829	#N/A	#N/A	#N/A
Hvul_g24271_1	Neurons	Hvul	10 (Neurons 2)	QW917-024396	RPUSD2_4	RNA pseudouridylate synthase domain containing protein 2	IPR006145 Pseudouridine synthase, RsuA/RluA-like;IPR020103 Pseudouridine synthase, catalytic domain superfamily
Nvec_v1g186216_2	Neurons	Nvec	10 (Neurons 2)	QW917-024396	RPUSD2_4	RNA pseudouridylate synthase domain containing protein 2	IPR006145 Pseudouridine synthase, RsuA/RluA-like;IPR020103 Pseudouridine synthase, catalytic domain superfamily
Hvul_g10514_1	Precursors	Hvul	10 (Neurons 2)	QW917-002305	0	hypothetical protein	IPR000742 EGF-like domain;IPR001304 C-type lectin-like;IPR001881 EGF-like calcium-binding domain;IPR002035 von Willebrand factor, type A;IPR013320 Concanavalin A-like lectin/glucanase domain superfamily;IPR014044 CAP domain;IPR016186 C-type lectin-like/link domain superfamily;IPR016187 C-type lectin fold;IPR034113 Golgi-associated plant pathogenesis-related protein 1, SCP domain;IPR035940 CAP sup…
Hvul_g33550_1	Precursors	Hvul	10 (Neurons 2)	QW917-010244	0	tRNA-Asn	0
Hvul_g419_1	Precursors	Hvul	10 (Neurons 2)	QW917-024152	0	hypothetical protein	IPR000073 Alpha/beta hydrolase fold-1;IPR029058 Alpha/Beta hydrolase fold
Spis_XP_022798226_1	Germline	Spis	11 (Gland 2)	QW917_009852	#N/A	#N/A	#N/A
Hvul_g30764_1	Gland	Hvul	11 (Gland 2)	QW917-003645	0	hypothetical protein	0
Nvec_v1g162983	Gland	Nvec	11 (Gland 2)	QW917-033413	0	hypothetical protein	IPR011658 PA14 domain
Nvec_v1g203270_1	Gland	Nvec	11 (Gland 2)	QW917-033685, QW917-033686, QW917-033690	#N/A	#N/A	#N/A
Nvec_v1g203270_2	Gland	Nvec	11 (Gland 2)	QW917-033692	0	hypothetical protein	0
Nvec_v1g203613	Gland	Nvec	11 (Gland 2)	QW917-017133	0	hypothetical protein	IPR015526 Frizzled/secreted frizzled-related protein;IPR020067 Frizzled domain;IPR036790 Frizzled cysteine-rich domain superfamily
Nvec_v1g237940	Gland	Nvec	11 (Gland 2)	QW917-003100	0	hypothetical protein	IPR001005 SANT/Myb domain;IPR009057 Homeobox-like domain superfamily;IPR013766 Thioredoxin domain;IPR036249 Thioredoxin-like superfamily
Xesp_018671	Gland	Xesp	11 (Gland 2)	QW917-022169	0	tRNA-Thr	0
Xesp_021837	Gland	Xesp	11 (Gland 2)	QW917-033690	0	hypothetical protein	0
Spis_XP_022791277_1	Gland	Spis	11 (Gland 2)	QW917_033692	#N/A	#N/A	#N/A
Spis_XP_022795168_1	Gland	Spis	11 (Gland 2)	QW917_004494	#N/A	#N/A	#N/A
Hvul_g24271_4	Neurons	Hvul	11 (Gland 2)	QW917-017068	GLB1L2_2	Beta-galactosidase-1-like protein 2	IPR001944 Glycoside hydrolase, family 35;IPR008979 Galactose-binding-like domain superfamily;IPR017853 Glycoside hydrolase superfamily;IPR026283 Beta-galactosidase 1-like;IPR031330 Glycoside hydrolase 35, catalytic domain
Xesp_014471_1	Precursors	Xesp	11 (Gland 2)	QW917-007019	0	hypothetical protein	IPR010255 Haem peroxidase superfamily;IPR019791 Haem peroxidase, animal-type;IPR037120 Haem peroxidase domain superfamily, animal type
Xesp_014108	Algal Hosting Cells	Xesp	12 (Neurons 3)	QW917-017490	0	hypothetical protein	0
Xesp_013615_2	Epidermis	Xesp	12 (Neurons 3)	QW917-000952	0	hypothetical protein	IPR007145 Microtubule-associated protein, MAP65/Ase1/PRC1
Nvec_v1g200103	Gastrodermis	Nvec	12 (Neurons 3)	QW917-005511	0	hypothetical protein	IPR000276 G protein-coupled receptor, rhodopsin-like
Nvec_v1g160716_2	Neurons	Nvec	12 (Neurons 3)	QW917-029994	0	hypothetical protein	IPR011029 Death-like domain superfamily
Xesp_007182_2	Neurons	Xesp	12 (Neurons 3)	QW917-025267	0	hypothetical protein	IPR001895 Ras guanine-nucleotide exchange factors catalytic domain;IPR008937 Ras-like guanine nucleotide exchange factor;IPR011989 Armadillo-like helical;IPR011993 PH-like domain superfamily;IPR014352 FERM/acyl-CoA-binding protein superfamily;IPR016024 Armadillo-type fold;IPR019748 FERM central domain;IPR023578 Ras guanine nucleotide exchange factor domain superfamily;IPR035963 FERM superfamily, …
Xesp_013614_3	Neurons	Xesp	12 (Neurons 3)	QW917-010563	0	tRNA-Thr	0
Spis_XP_022786096_2	Neurons	Spis	12 (Neurons 3)	QW917_019811	#N/A	#N/A	#N/A
Spis_XP_022786297_1	Neurons	Spis	12 (Neurons 3)	QW917_008372	#N/A	#N/A	#N/A
Xesp_014471_3	Precursors	Xesp	12 (Neurons 3)	QW917-000952	0	hypothetical protein	IPR007145 Microtubule-associated protein, MAP65/Ase1/PRC1
Hvul_g11543_1	Epidermis	Hvul	13 (Gastrodermis (Muscle-like))	QW917-005475	0	hypothetical protein	IPR000210 BTB/POZ domain;IPR000408 Regulator of chromosome condensation, RCC1;IPR001452 SH3 domain;IPR002110 Ankyrin repeat;IPR009091 Regulator of chromosome condensation 1/beta-lactamase-inhibitor protein II;IPR011333 SKP1/BTB/POZ domain superfamily;IPR036028 SH3-like domain superfamily;IPR036770 Ankyrin repeat-containing domain superfamily
Hvul_g11543_3	Epidermis	Hvul	13 (Gastrodermis (Muscle-like))	QW917-009832	0	hypothetical protein	IPR021930 Heparan sulphate-N-deacetylase
Nvec_v1g234494_2	Epidermis	Nvec	13 (Gastrodermis (Muscle-like))	QW917-013951	NPY1R_2	Belongs to the G-protein coupled receptor 1	IPR000276 G protein-coupled receptor, rhodopsin-like
Nvec_v1g234494_4	Epidermis	Nvec	13 (Gastrodermis (Muscle-like))	QW917-031802	0	hypothetical protein	0
Hvul_g10382_2	Gastrodermis	Hvul	13 (Gastrodermis (Muscle-like))	QW917-013951	NPY1R_2	Belongs to the G-protein coupled receptor 1	IPR000276 G protein-coupled receptor, rhodopsin-like
Hvul_g10382_4	Gastrodermis	Hvul	13 (Gastrodermis (Muscle-like))	QW917-031802	0	hypothetical protein	0
Nvec_v1g204742	Gastrodermis	Nvec	13 (Gastrodermis (Muscle-like))	QW917-015057	0	hypothetical protein	IPR000308 14-3-3 protein;IPR023410 14-3-3 domain;IPR036815 14-3-3 domain superfamily
Nvec_v1g84136_2	Gastrodermis	Nvec	13 (Gastrodermis (Muscle-like))	QW917-027832	PLA1A	Phospholipase A1 member A	IPR000734 Triacylglycerol lipase family;IPR013818 Lipase;IPR029058 Alpha/Beta hydrolase fold;IPR033906 Lipase, N-terminal
Xesp_001362_1	Gastrodermis	Xesp	13 (Gastrodermis (Muscle-like))	QW917-015050	0	hypothetical protein	0
Xesp_001362_2	Gastrodermis	Xesp	13 (Gastrodermis (Muscle-like))	QW917-015074	0	hypothetical protein	0
Xesp_002928	Gastrodermis	Xesp	13 (Gastrodermis (Muscle-like))	QW917-029435	DIO3_7	Thyroxine 5-deiodinase	IPR000643 Iodothyronine deiodinase
Xesp_014296	Gastrodermis	Xesp	13 (Gastrodermis (Muscle-like))	QW917-018818	S1PR1_2	Sphingosine 1-phosphate receptor 1	IPR000276 G protein-coupled receptor, rhodopsin-like
Xesp_015896	Gastrodermis	Xesp	13 (Gastrodermis (Muscle-like))	QW917-022246	RTEL1	Regulator of telomere elongation helicase 1, variant 2	IPR006555 ATP-dependent helicase, C-terminal;IPR010614 RAD3-like helicase, DEAD;IPR013020 ATP-dependent helicase Rad3/Chl1-like;IPR027417 P-loop containing nucleoside triphosphate hydrolase;IPR036600 Paired amphipathic helix superfamily;IPR045028 Helicase superfamily 1/2, DinG/Rad3-like
Spis_XP_022793420_3	Gastrodermis	Spis	13 (Gastrodermis (Muscle-like))	QW917_023314	#N/A	#N/A	#N/A
Nvec_v1g169611_2	Muscle	Nvec	13 (Gastrodermis (Muscle-like))	QW917-031802	0	hypothetical protein	0
Nvec_v1g203298	Muscle	Nvec	13 (Gastrodermis (Muscle-like))	QW917-005475	0	hypothetical protein	IPR000210 BTB/POZ domain;IPR000408 Regulator of chromosome condensation, RCC1;IPR001452 SH3 domain;IPR002110 Ankyrin repeat;IPR009091 Regulator of chromosome condensation 1/beta-lactamase-inhibitor protein II;IPR011333 SKP1/BTB/POZ domain superfamily;IPR036028 SH3-like domain superfamily;IPR036770 Ankyrin repeat-containing domain superfamily
Nvec_v1g233305	Muscle	Nvec	13 (Gastrodermis (Muscle-like))	QW917-013062	0	hypothetical protein	IPR013568 SEFIR domain
Xesp_014332	Muscle	Xesp	13 (Gastrodermis (Muscle-like))	QW917-005475	0	hypothetical protein	IPR000210 BTB/POZ domain;IPR000408 Regulator of chromosome condensation, RCC1;IPR001452 SH3 domain;IPR002110 Ankyrin repeat;IPR009091 Regulator of chromosome condensation 1/beta-lactamase-inhibitor protein II;IPR011333 SKP1/BTB/POZ domain superfamily;IPR036028 SH3-like domain superfamily;IPR036770 Ankyrin repeat-containing domain superfamily
Xesp_016506	Muscle	Xesp	13 (Gastrodermis (Muscle-like))	QW917-014493	DUS1L_1	tRNA-dihydrouridine(16/17) synthase [NAD(P)(+)]-like protein	IPR001269 tRNA-dihydrouridine synthase;IPR013785 Aldolase-type TIM barrel;IPR035587 DUS-like, FMN-binding domain
Xesp_027499	Muscle	Xesp	13 (Gastrodermis (Muscle-like))	QW917-013062	0	hypothetical protein	IPR013568 SEFIR domain
Xesp_027596	Muscle	Xesp	13 (Gastrodermis (Muscle-like))	QW917-013062	0	hypothetical protein	IPR013568 SEFIR domain
Xesp_009450_1	Digestive Filaments	Xesp	15 (Digestive Filaments)	QW917-025039	0	hypothetical protein	0
Xesp_009450_2	Digestive Filaments	Xesp	15 (Digestive Filaments)	QW917-034995	0	hypothetical protein	0
Xesp_009450_3	Digestive Filaments	Xesp	15 (Digestive Filaments)	QW917-035002	0	hypothetical protein	IPR005828 Major facilitator, sugar transporter-like;IPR036259 MFS transporter superfamily
Xesp_009450_4	Digestive Filaments	Xesp	15 (Digestive Filaments)	QW917-024898	SLC7A9_5	b(0,+)-type amino acid transporter 1	IPR002293 Amino acid/polyamine transporter I
Xesp_008614	Gland	Xesp	15 (Digestive Filaments)	QW917-004379	0	hypothetical protein	0
Spis_XP_022804025_1	Mitotic Host Cells	Spis	15 (Digestive Filaments)	QW917_010450-T1, QW917_010450-T2, QW917_026574-T1	#N/A	#N/A	#N/A
Xesp_017409	Precursors	Xesp	15 (Digestive Filaments)	QW917-013028	0	hypothetical protein	IPR000008 C2 domain;IPR035892 C2 domain superfamily;IPR037785 C2CD5, C2 domain;IPR038983 C2 domain-containing protein 5
Xesp_000857_1	Algal Hosting Cells	Xesp	16 (Precursors)	QW917_015477	#N/A	#N/A	#N/A
Xesp_014909_2	Algal Hosting Cells	Xesp	16 (Precursors)	QW917-035795	0	tRNA-Thr	0
Xesp_022796_2	Algal Hosting Cells	Xesp	16 (Precursors)	QW917-035795	0	tRNA-Thr	0
Xesp_022796_3	Algal Hosting Cells	Xesp	16 (Precursors)	QW917-007571	0	tRNA-Thr	0
Xesp_022796_4	Algal Hosting Cells	Xesp	16 (Precursors)	QW917-021556	IPO9	Importin 9	IPR011989 Armadillo-like helical;IPR016024 Armadillo-type fold
Spis_XP_022782026_1	Algal Hosting Cells	Spis	16 (Precursors)	QW917_012682	#N/A	#N/A	#N/A
Spis_XP_022786709_2	Algal Hosting Cells	Spis	16 (Precursors)	QW917_012682	#N/A	#N/A	#N/A
Spis_XP_022796708_1	Algal Hosting Cells	Spis	16 (Precursors)	QW917_008477	#N/A	#N/A	#N/A
Nvec_v1g242265	Digestive Filaments	Nvec	16 (Precursors)	QW917-035246	0	hypothetical protein	IPR001599 Alpha-2-macroglobulin;IPR008930 Terpenoid cyclases/protein prenyltransferase alpha-alpha toroid;IPR008993 Tissue inhibitor of metalloproteinases-like, OB-fold;IPR009048 Alpha-macroglobulin, receptor-binding;IPR011625 Alpha-2-macroglobulin, bait region domain;IPR011626 Alpha-macroglobulin-like, TED domain;IPR013783 Immunoglobulin-like fold;IPR014756 Immunoglobulin E-set;IPR018933 Netrin …
Nvec_v1g234494_1	Epidermis	Nvec	16 (Precursors)	QW917-013951	NPY1R_2	Belongs to the G-protein coupled receptor 1	IPR000276 G protein-coupled receptor, rhodopsin-like
Hvul_g10382_1	Gastrodermis	Hvul	16 (Precursors)	QW917-013951	NPY1R_2	Belongs to the G-protein coupled receptor 1	IPR000276 G protein-coupled receptor, rhodopsin-like
Spis_XP_022806608_1	Germline	Spis	16 (Precursors)	QW917_032518	#N/A	#N/A	#N/A
Spis_XP_022802936_1	Immune	Spis	16 (Precursors)	QW917_008477	#N/A	#N/A	#N/A
Spis_XP_022802946_1	Immune	Spis	16 (Precursors)	QW917_008482	#N/A	#N/A	#N/A
Spis_XP_022793409_1	Mitotic Host Cells	Spis	16 (Precursors)	QW917_033884	#N/A	#N/A	#N/A
Nvec_v1g214299_2	Muscle	Nvec	16 (Precursors)	QW917-012816	PGS1	CDP-diacylglycerol--glycerol-3-phosphate 3-phosphatidyltransferase, variant 2	IPR016270 CDP-alcohol phosphatidyltransferase class-II family
Nvec_v1g129977_2	Neurons	Nvec	16 (Precursors)	QW917-030855	0	hypothetical protein	IPR001759 Pentraxin-related;IPR013320 Concanavalin A-like lectin/glucanase domain superfamily
Xesp_013614_4	Neurons	Xesp	16 (Precursors)	QW917-021864	0	tRNA-Trp	0
Xesp_014743_1	Neurons	Xesp	16 (Precursors)	QW917-012978	0	hypothetical protein	IPR000917 Sulfatase, N-terminal;IPR017850 Alkaline-phosphatase-like, core domain superfamily
Xesp_018334_1	Precursors	Xesp	16 (Precursors)	QW917-004466	0	hypothetical protein	IPR000742 EGF-like domain;IPR001881 EGF-like calcium-binding domain;IPR002126 Cadherin-like;IPR013032 EGF-like, conserved site;IPR015919 Cadherin-like superfamily
Xesp_018334_3	Precursors	Xesp	16 (Precursors)	QW917-011148	0	hypothetical protein	IPR006862 Acyl-CoA thioester hydrolase/bile acid-CoA amino acid N-acetyltransferase;IPR014940 BAAT/Acyl-CoA thioester hydrolase C-terminal;IPR016662 Acyl-CoA thioesterase, long chain;IPR029058 Alpha/Beta hydrolase fold;IPR042490 Acyl-CoA thioester hydrolase/BAAT, N-terminal
Spis_XP_022787678_2	Digestive Filaments	Spis	17 (Gland 3)	QW917_022743	#N/A	#N/A	#N/A
Nvec_v1g165261	Digestive Filaments	Nvec	17 (Gland 3)	QW917-034264	0	tRNA-Thr	0
Spis_XP_022793420_4	Gastrodermis	Spis	17 (Gland 3)	QW917_023314	#N/A	#N/A	#N/A
Spis_XP_022801030_1	Mitotic Host Cells	Spis	17 (Gland 3)	QW917_017195	#N/A	#N/A	#N/A
Spis_XP_022780302_2	Neurons	Spis	17 (Gland 3)	QW917_014543	#N/A	#N/A	#N/A
Xesp_013753_2	Precursors	Xesp	17 (Gland 3)	QW917-014453	0	tRNA-Arg	0
Xesp_027769	Precursors	Xesp	17 (Gland 3)	QW917-006751	0	hypothetical protein	IPR001849 Pleckstrin homology domain;IPR010569 Myotubularin-like, phosphatase domain;IPR011993 PH-like domain superfamily;IPR029021 Protein-tyrosine phosphatase-like;IPR030564 Myotubularin family
Xesp_002591	Algal Hosting Cells	Xesp	18 (Cnidocytes)	QW917-001934	0	hypothetical protein	IPR002915 DeoC/FbaB/LacD aldolase;IPR011343 Deoxyribose-phosphate aldolase;IPR013785 Aldolase-type TIM barrel
Nvec_v1g232014	Cnidocytes	Nvec	18 (Cnidocytes)	QW917-025190	0	hypothetical protein	IPR001128 Cytochrome P450;IPR002401 Cytochrome P450, E-class, group I;IPR036396 Cytochrome P450 superfamily
Nvec_v1g232015	Cnidocytes	Nvec	18 (Cnidocytes)	QW917-025189	0	hypothetical protein	IPR001128 Cytochrome P450;IPR002401 Cytochrome P450, E-class, group I;IPR036396 Cytochrome P450 superfamily
Nvec_v1g238392	Cnidocytes	Nvec	18 (Cnidocytes)	QW917-017141	0	hypothetical protein	IPR026716 PABIR1/2/3
Xesp_000432	Cnidocytes	Xesp	18 (Cnidocytes)	QW917-016641	#N/A	#N/A	#N/A
Xesp_001210	Cnidocytes	Xesp	18 (Cnidocytes)	QW917-016641	0	hypothetical protein	IPR000436 Sushi/SCR/CCP domain;IPR001304 C-type lectin-like;IPR016186 C-type lectin-like/link domain superfamily;IPR016187 C-type lectin fold;IPR035976 Sushi/SCR/CCP superfamily
Xesp_009933_1	Cnidocytes	Xesp	18 (Cnidocytes)	QW917-017057	BMS1	Glycoside hydrolase 2 (Mannanase, beta-galactosidase)	IPR007034 Ribosome biogenesis protein BMS1/TSR1, C-terminal;IPR012948 AARP2CN;IPR027417 P-loop containing nucleoside triphosphate hydrolase;IPR037875 Ribosome biogenesis protein Bms1, N-terminal;IPR039761 Ribosome biogenesis protein Bms1/Tsr1
Xesp_009933_2	Cnidocytes	Xesp	18 (Cnidocytes)	QW917-017058	NPFFR2_6	Neuropeptide FF receptor 2	IPR000276 G protein-coupled receptor, rhodopsin-like
Xesp_011801	Cnidocytes	Xesp	18 (Cnidocytes)	QW917-006254	0	hypothetical protein	IPR000742 EGF-like domain;IPR001881 EGF-like calcium-binding domain;IPR002035 von Willebrand factor, type A;IPR009030 Growth factor receptor cysteine-rich domain superfamily;IPR024731 EGF domain;IPR036465 von Willebrand factor A-like domain superfamily
Xesp_028815	Cnidocytes	Xesp	18 (Cnidocytes)	QW917-014975	0	hypothetical protein	0
Spis_XP_022787371_1	Cnidocytes	Spis	18 (Cnidocytes)	QW917_014975	#N/A	Collagen.HG10.0:NA	#N/A
Spis_XP_022789489_1	Cnidocytes	Spis	18 (Cnidocytes)	QW917_001734	#N/A	uncharacterized protein LOC111329142	#N/A
Spis_XP_022789491_1	Cnidocytes	Spis	18 (Cnidocytes)	QW917_001714	#N/A	LOW QUALITY PROTEIN: uncharacterized protein LOC111329145	#N/A
Spis_XP_022789499_1	Cnidocytes	Spis	18 (Cnidocytes)	QW917_001720	#N/A	uncharacterized protein LOC111329156 isoform X1	#N/A
Spis_XP_022794104_1	Cnidocytes	Spis	18 (Cnidocytes)	QW917_035574	#N/A	phosphopantothenoylcysteine decarboxylase subunit VHS3-like isoform X2	#N/A
Spis_XP_022795719_1	Cnidocytes	Spis	18 (Cnidocytes)	QW917_001007	#N/A	protein starmaker-like	#N/A
Spis_XP_022797422_1	Cnidocytes	Spis	18 (Cnidocytes)	QW917_017141	#N/A	formin-like protein 5	#N/A
Spis_XP_022797425_1	Cnidocytes	Spis	18 (Cnidocytes)	QW917_017140	#N/A	leucine-rich repeat extensin-like protein 3	#N/A
Spis_XP_022799416_1	Cnidocytes	Spis	18 (Cnidocytes)	QW917_016641	#N/A	Collagen.HG10.4:NA	#N/A
Spis_XP_022786665_1	Digestive Filaments	Spis	18 (Cnidocytes)	QW917_025301, QW917_025300	#N/A	#N/A	#N/A
Spis_XP_022801783_1	Germline	Spis	18 (Cnidocytes)	QW917_018822	#N/A	#N/A	#N/A
Spis_XP_022804025_2	Mitotic Host Cells	Spis	18 (Cnidocytes)	QW917_010450-T1, QW917_010450-T2,QW917_026574-T1	#N/A	#N/A	#N/A
Nvec_v1g129977_1	Neurons	Nvec	18 (Cnidocytes)	QW917-005577	MRPS9	37S ribosomal protein S9, mitochondrial	IPR000754 Ribosomal protein S9;IPR014721 Ribosomal protein S5 domain 2-type fold, subgroup;IPR020568 Ribosomal protein S5 domain 2-type fold
Nvec_v1g129977_4	Neurons	Nvec	18 (Cnidocytes)	QW917-005546	0	hypothetical protein	IPR001519 Ferritin;IPR007397 F-box associated (FBA) domain;IPR008331 Ferritin/DPS protein domain;IPR008979 Galactose-binding-like domain superfamily;IPR009078 Ferritin-like superfamily;IPR012347 Ferritin-like
Hvul_g11299_2	Precursors	Hvul	18 (Cnidocytes)	QW917-024236	FTSJ3	pre-rRNA processing protein ftsj3	IPR002877 Ribosomal RNA methyltransferase, FtsJ domain;IPR012920 Ribosomal RNA methyltransferase, SPB1-like, C-terminal;IPR024576 Ribosomal RNA methyltransferase Spb1, domain of unknown function DUF3381;IPR029063 S-adenosyl-L-methionine-dependent methyltransferase superfamily
Hvul_g1924_1	Precursors	Hvul	18 (Cnidocytes)	QW917-001202	0	hypothetical protein	0
Nvec_v1g131609_2	Precursors	Nvec	18 (Cnidocytes)	QW917-024236	FTSJ3	pre-rRNA processing protein ftsj3	IPR002877 Ribosomal RNA methyltransferase, FtsJ domain;IPR012920 Ribosomal RNA methyltransferase, SPB1-like, C-terminal;IPR024576 Ribosomal RNA methyltransferase Spb1, domain of unknown function DUF3381;IPR029063 S-adenosyl-L-methionine-dependent methyltransferase superfamily
							Collagen.HG10.0:NA		Collagen.HG10.0:NA
							Spis_XP_022789489_1		uncharacterized protein LOC111329142
							Spis_XP_022789491_1		LOW QUALITY PROTEIN: uncharacterized protein LOC111329145
							Spis_XP_022789499_1		uncharacterized protein LOC111329156 isoform X1
							Spis_XP_022794104_1		phosphopantothenoylcysteine decarboxylase subunit VHS3-like isoform X2
							Spis_XP_022795719_1		protein starmaker-like
							Spis_XP_022797422_1		formin-like protein 5
							Spis_XP_022797425_1		leucine-rich repeat extensin-like protein 3
							Spis_XP_022799416_1	Collagen/	Collagen.HG10.4:NA
