# Supplementary figures and images for: A Single-Cell Atlas of Coral Bleaching
Source: Research Square preprint supplement (doi:10.21203/rs.3.rs-5397639/v1), 2024-12-03

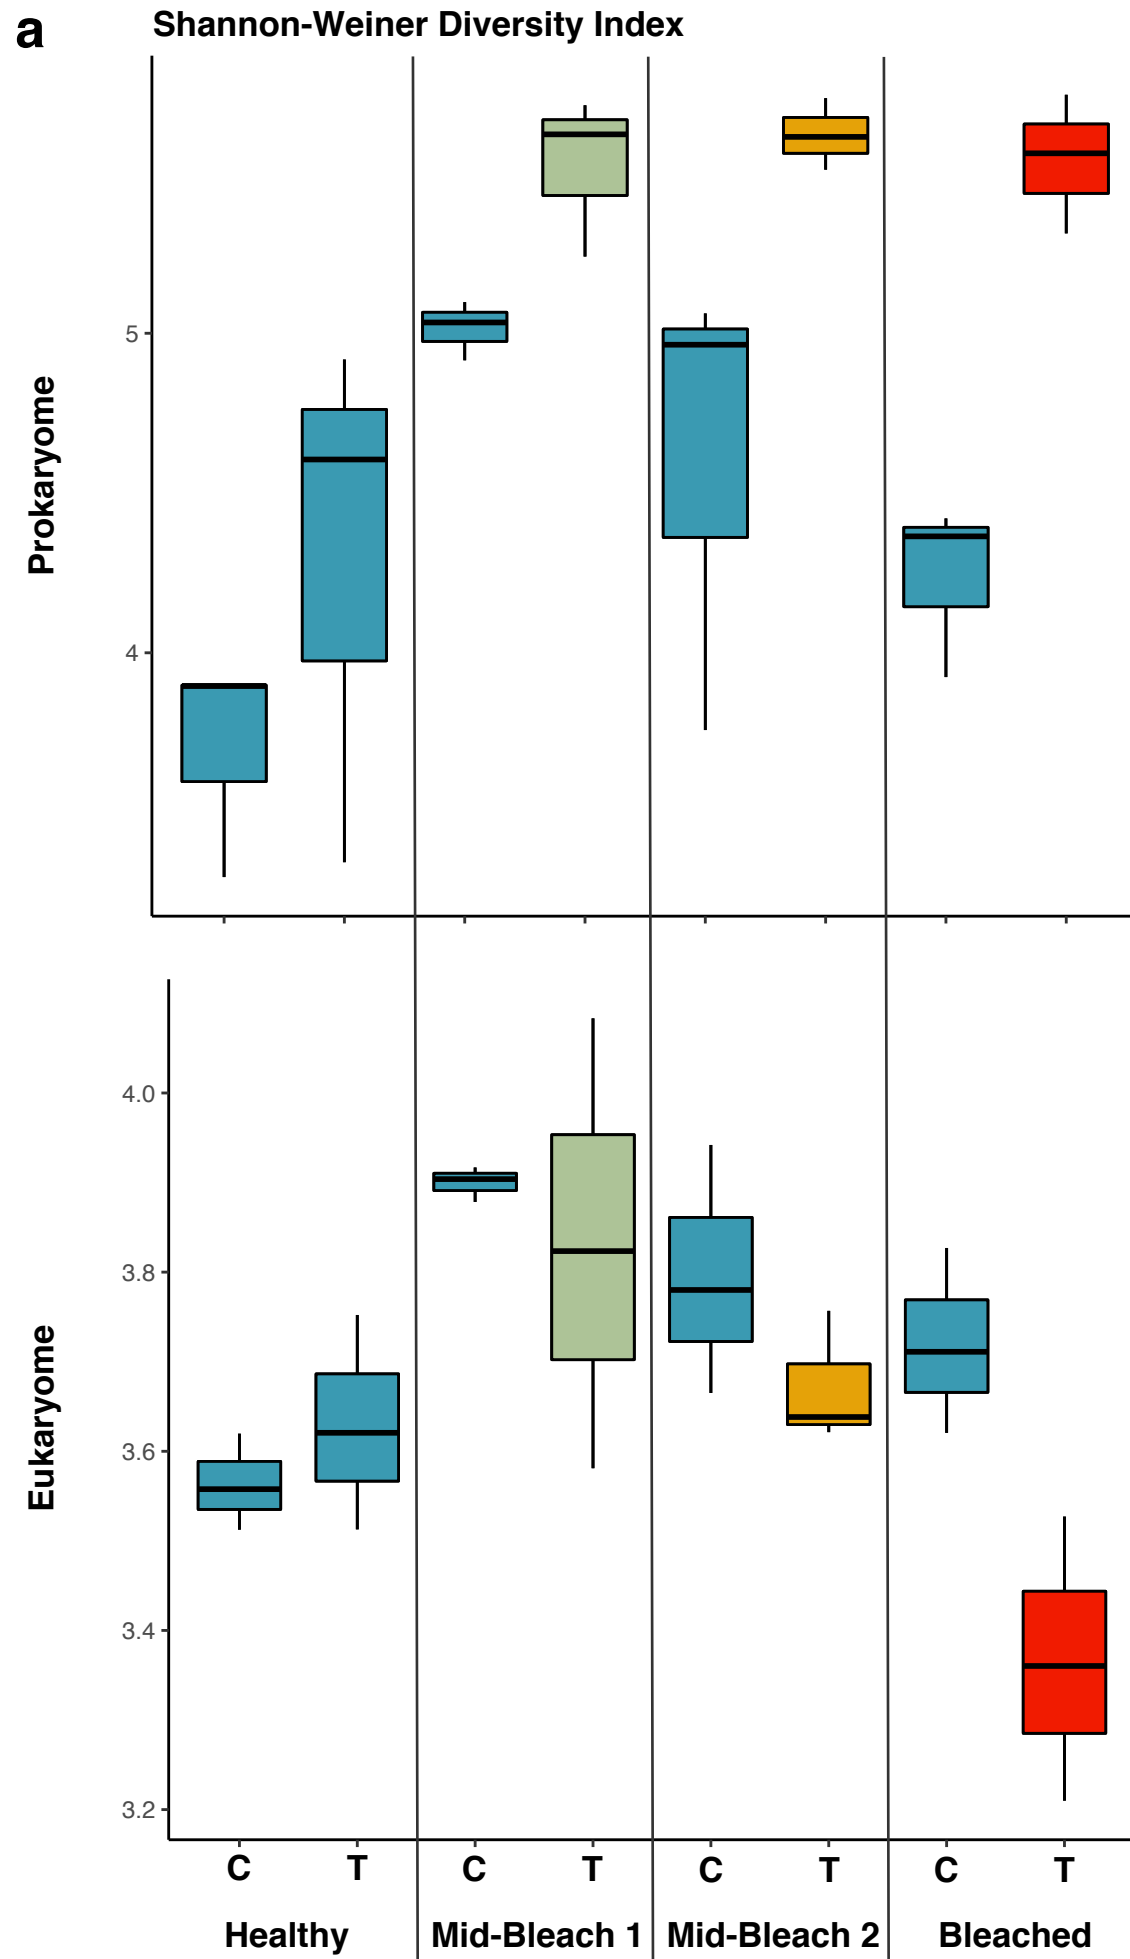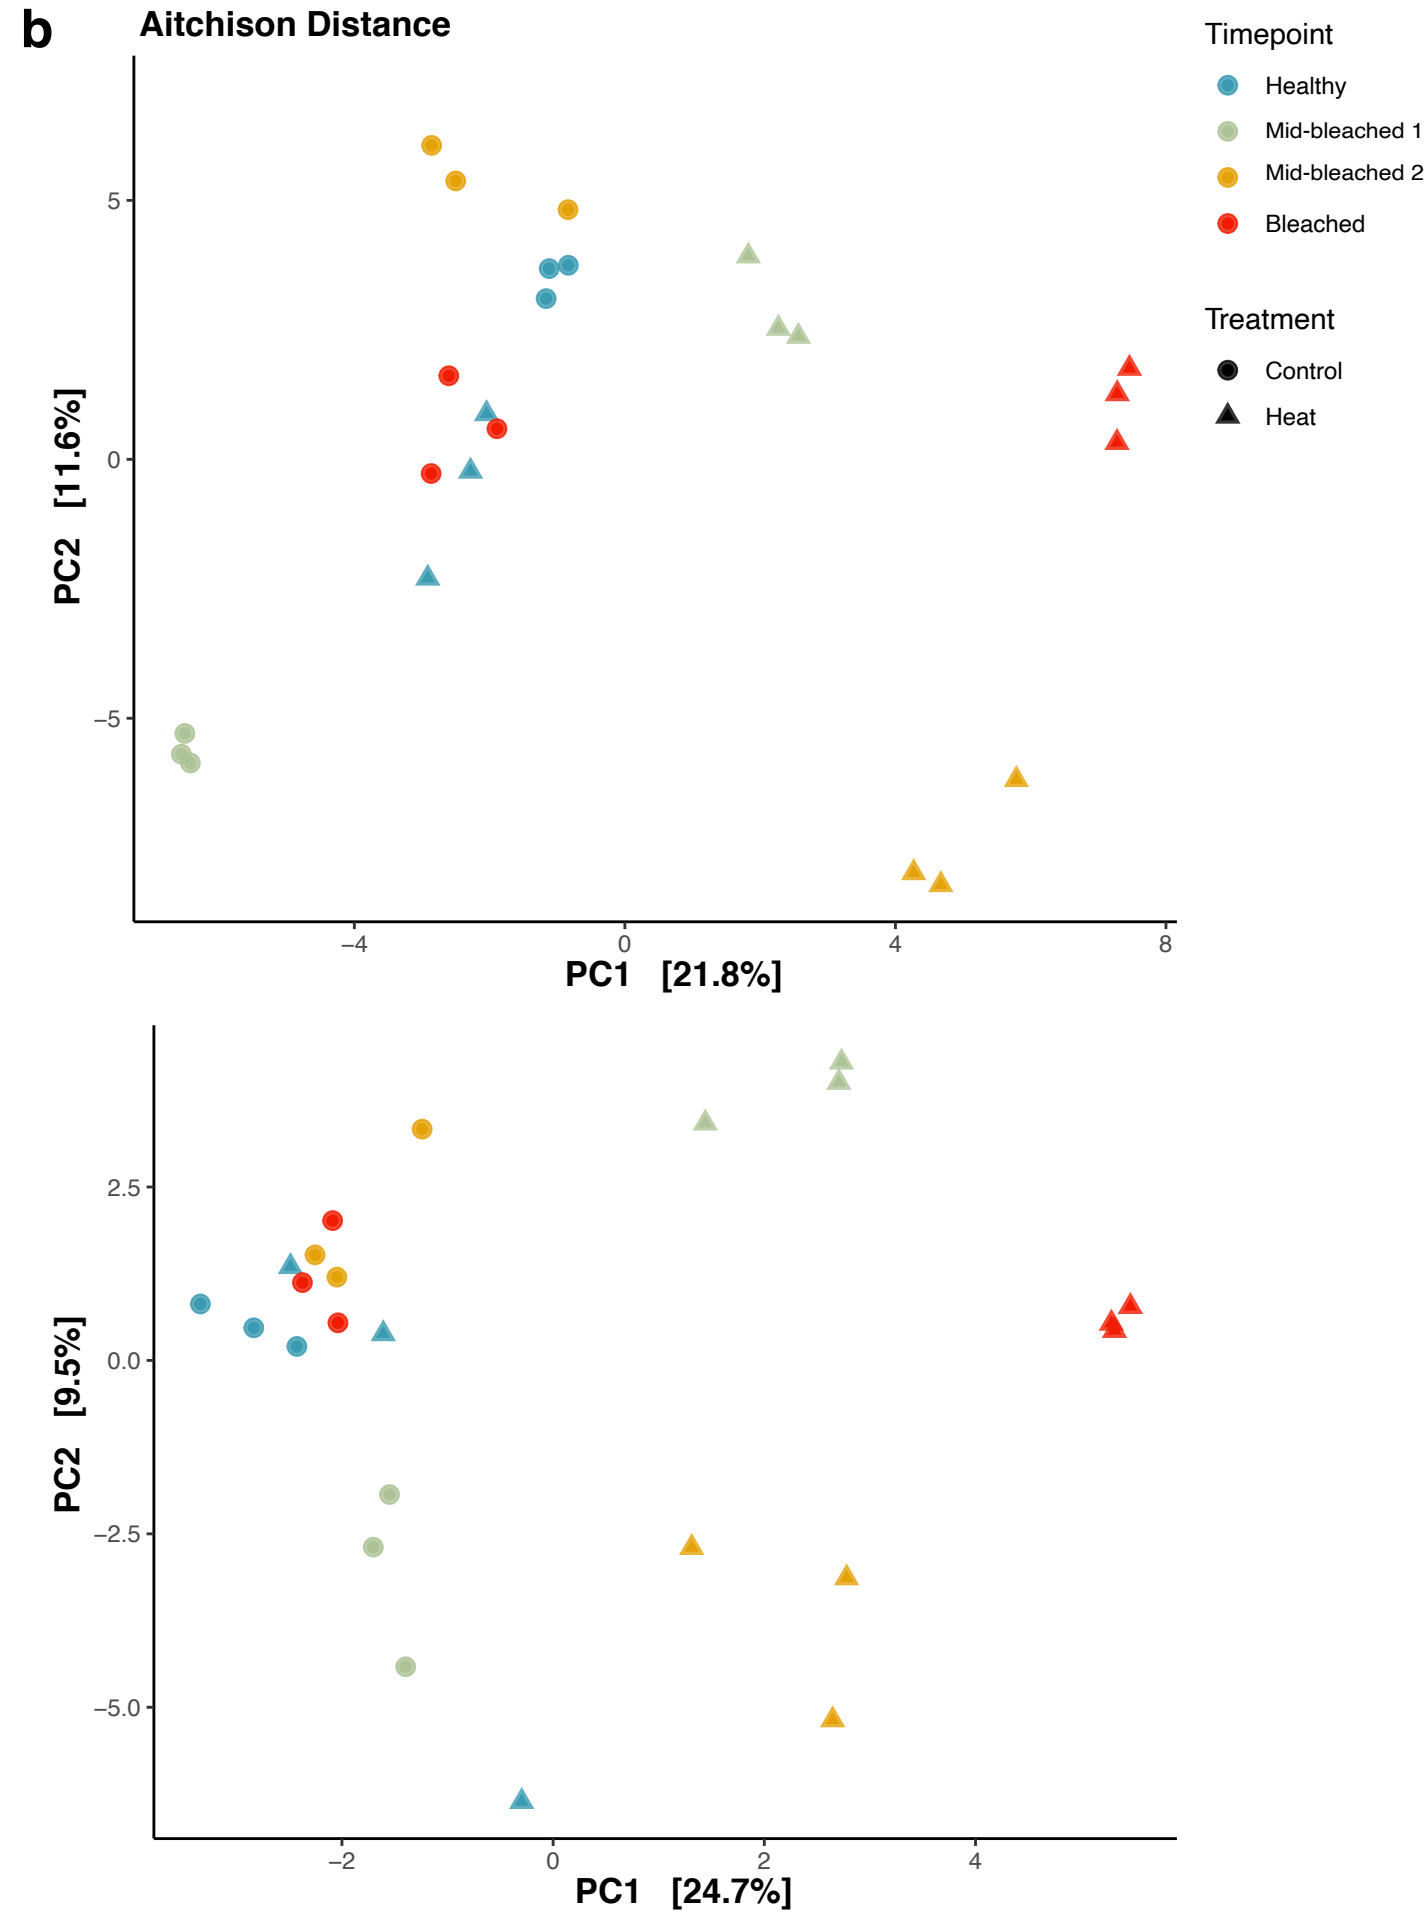

Supplement: Supplementary file 2 [file ec04b7ae18979b4b554dd698.pdf]
